# Supplementary material for: Machine learning methods to predict sea surface temperature and marine heatwave occurrence: a case study of the Mediterranean Sea
Source: Copernicus journal article supplement (doi:10.5194/os-20-417-2024), 2024-03-22
Supplement: Supplementary file 1 [file os-20-417-2024-supplement.pdf]

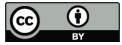

*Supplement of*

## **Machine learning methods to predict sea surface temperature and marine heatwave occurrence: a case study of the Mediterranean Sea**

**Giulia Bonino et al.**

*Correspondence to:* Giulia Bonino ([giulia.bonino@cmcc.it](mailto:giulia.bonino@cmcc.it))

The copyright of individual parts of the supplement might differ from the article licence.

# SUPPLEMENTARY MATERIAL

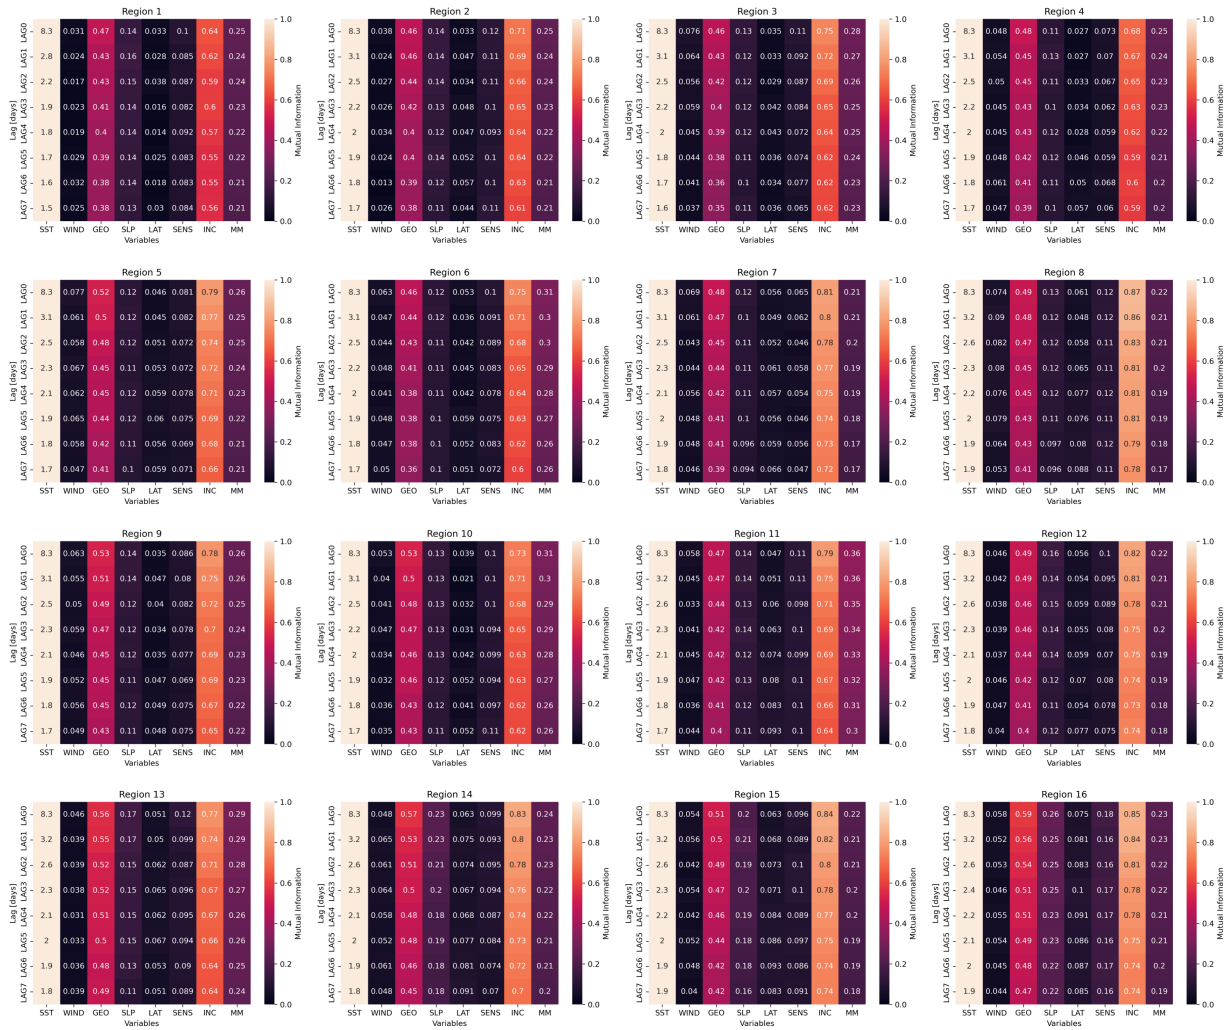

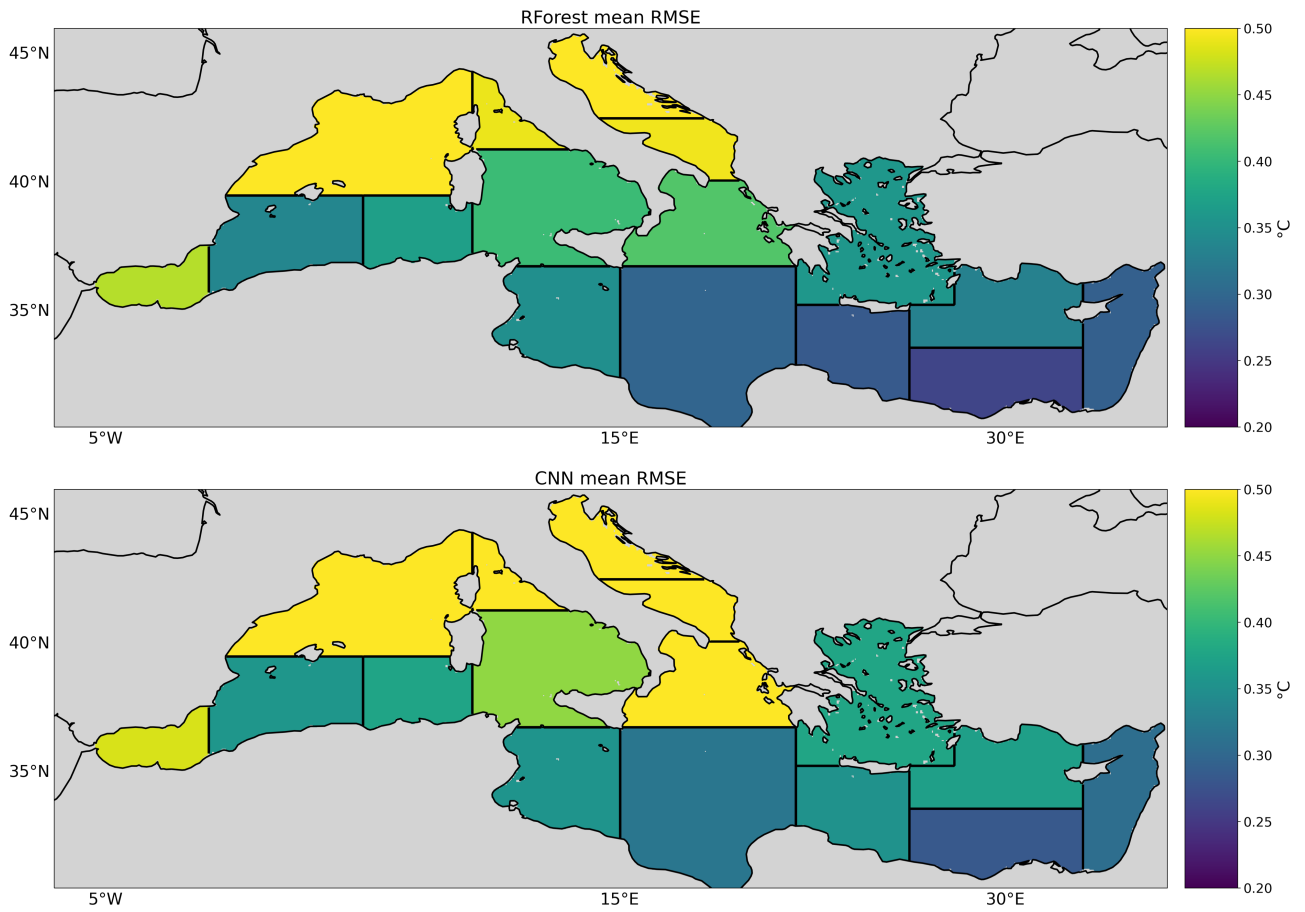

Figure S2: Rforest (top panel) and CNN (bottom panel) mean RMSE for REXPs for each region.

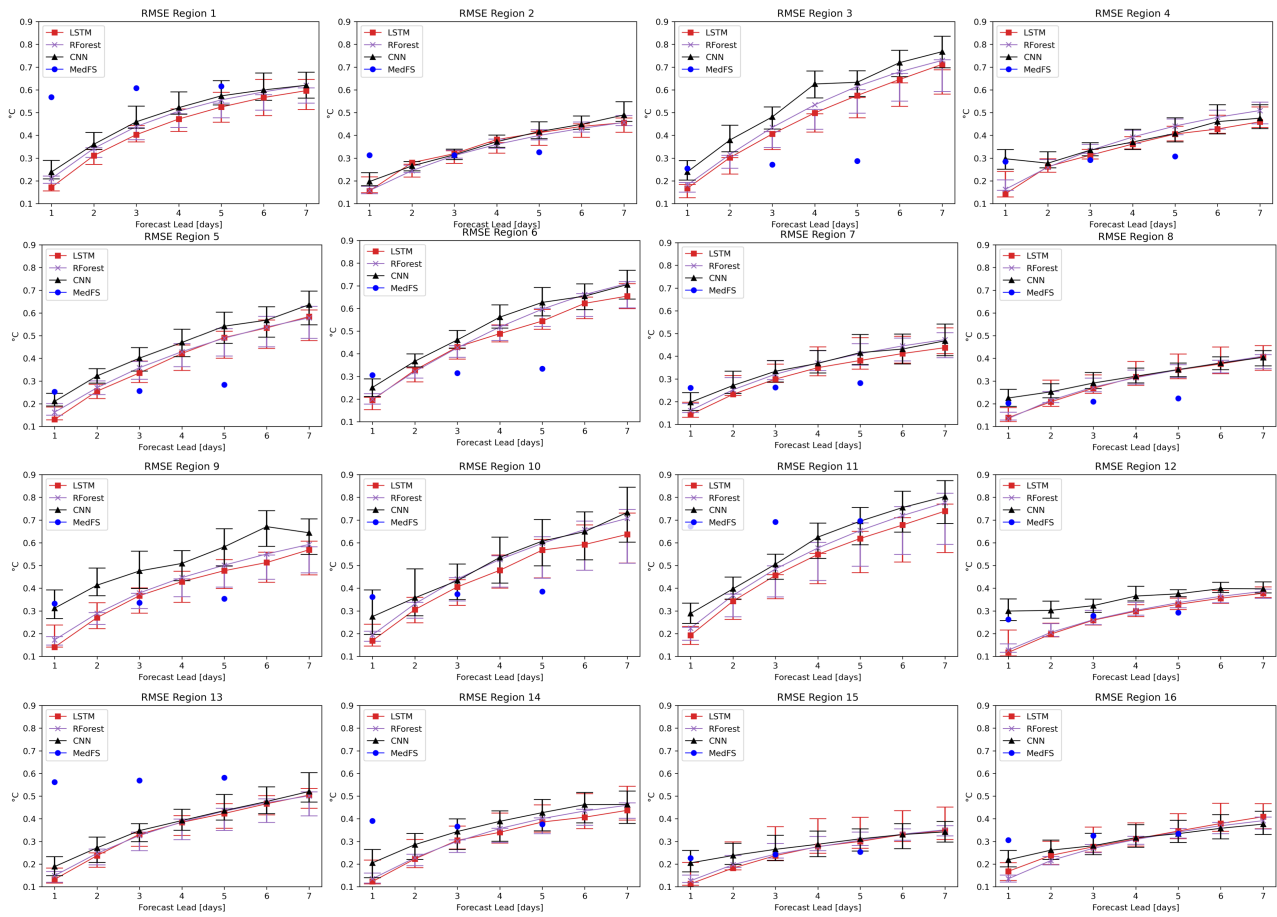

Figure S3: ML networks performance for the SST daily predictions in terms of Root Mean Square Error (RMSE) against the MedFS forecast system (MedFS) performance for each region.



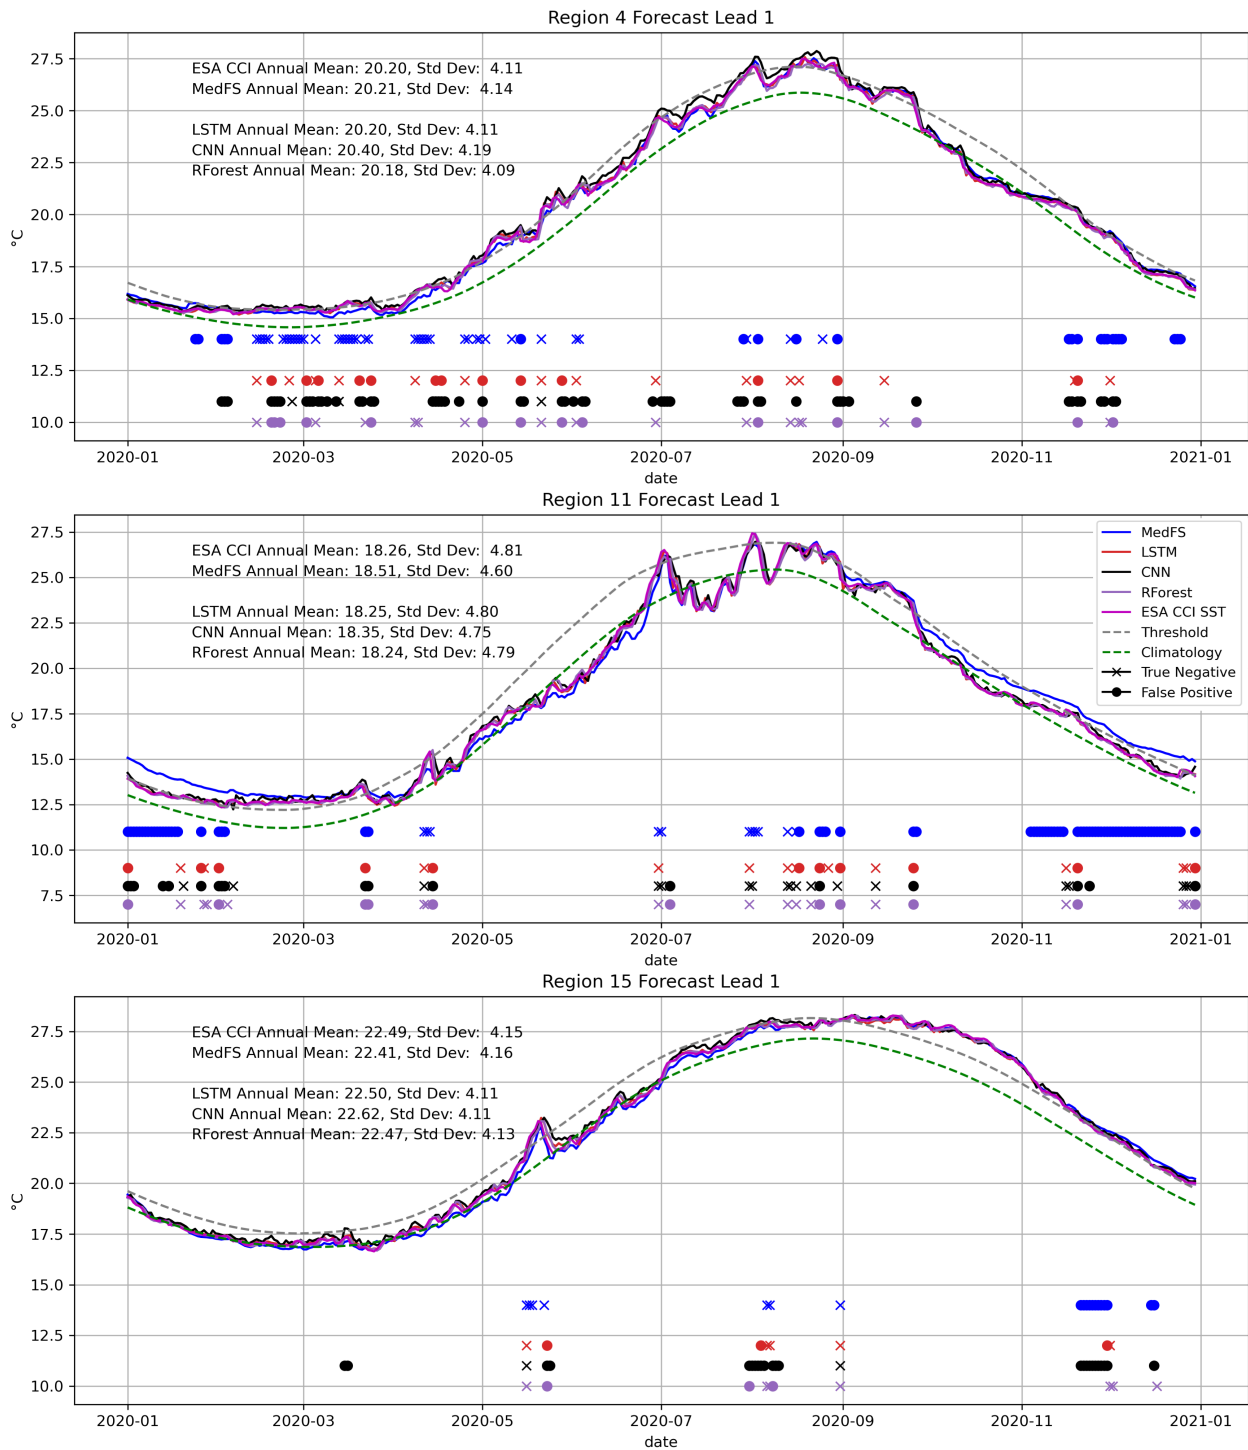

Figure S4: Time series of ESA CCI SST observed (OBS) and predicted at forecast lead time 5 by the ML models (LSTM, LinR, CNN, RForest) and by MedFS during 2020 for (top panel) Western Mediterranean, (middle panel) Central Mediterranean and (bottom panel) Eastern Mediterranean. The 90th percentile threshold to define MHWs is represented in gray. Crosses correspond to misses alarms (False negative) and points to false alarms (False Positive) in the forecasts output in predicting MHWs. Colors refer to the different ML models.

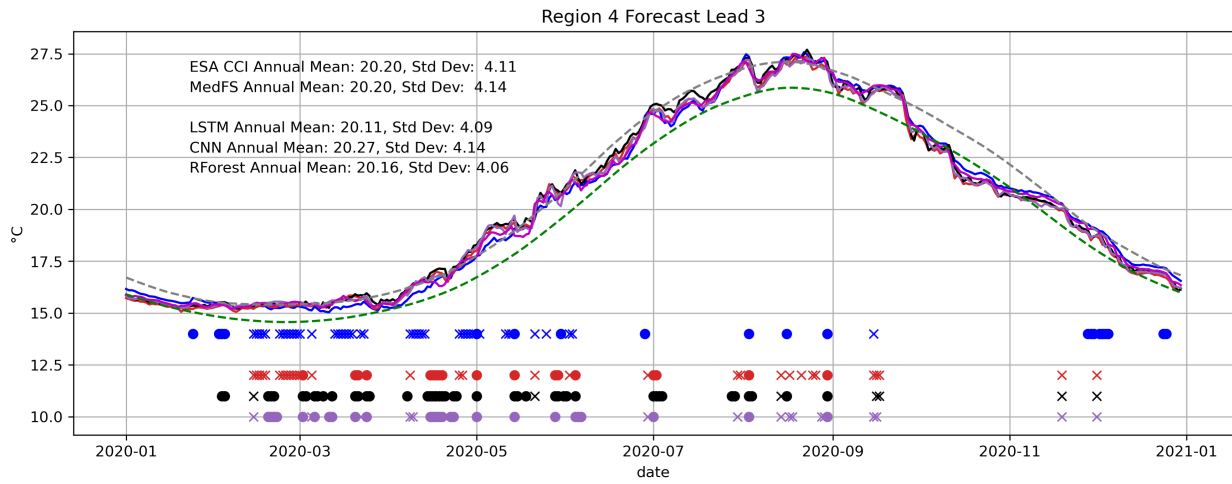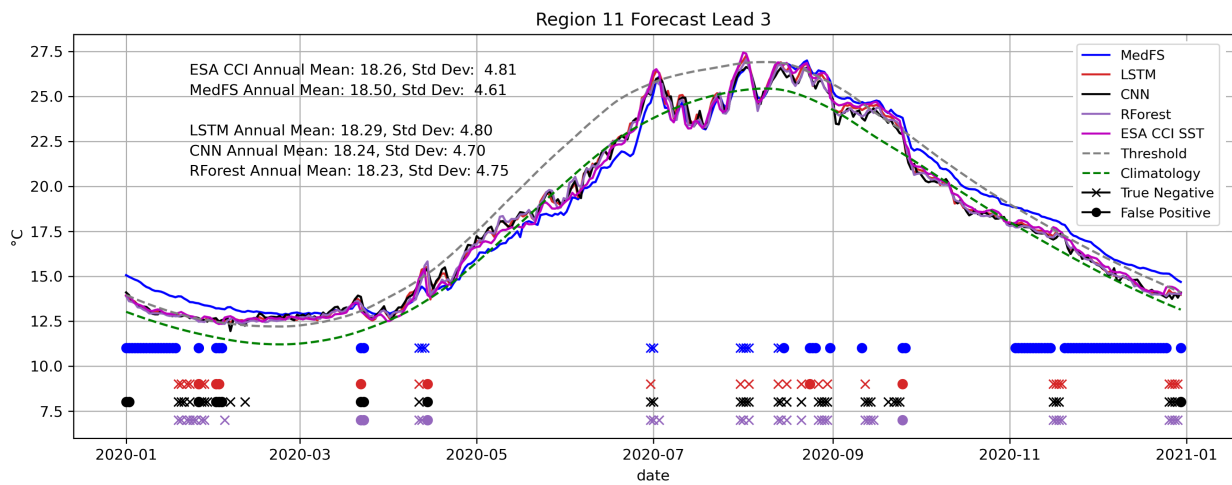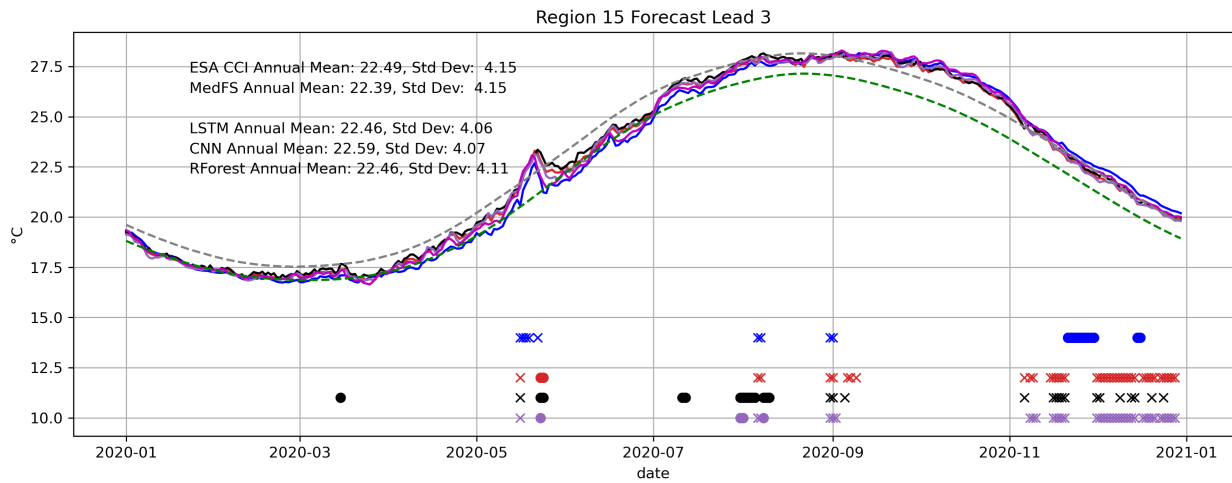

Figure S5: As Figure S4 but for forecast lead time 3.

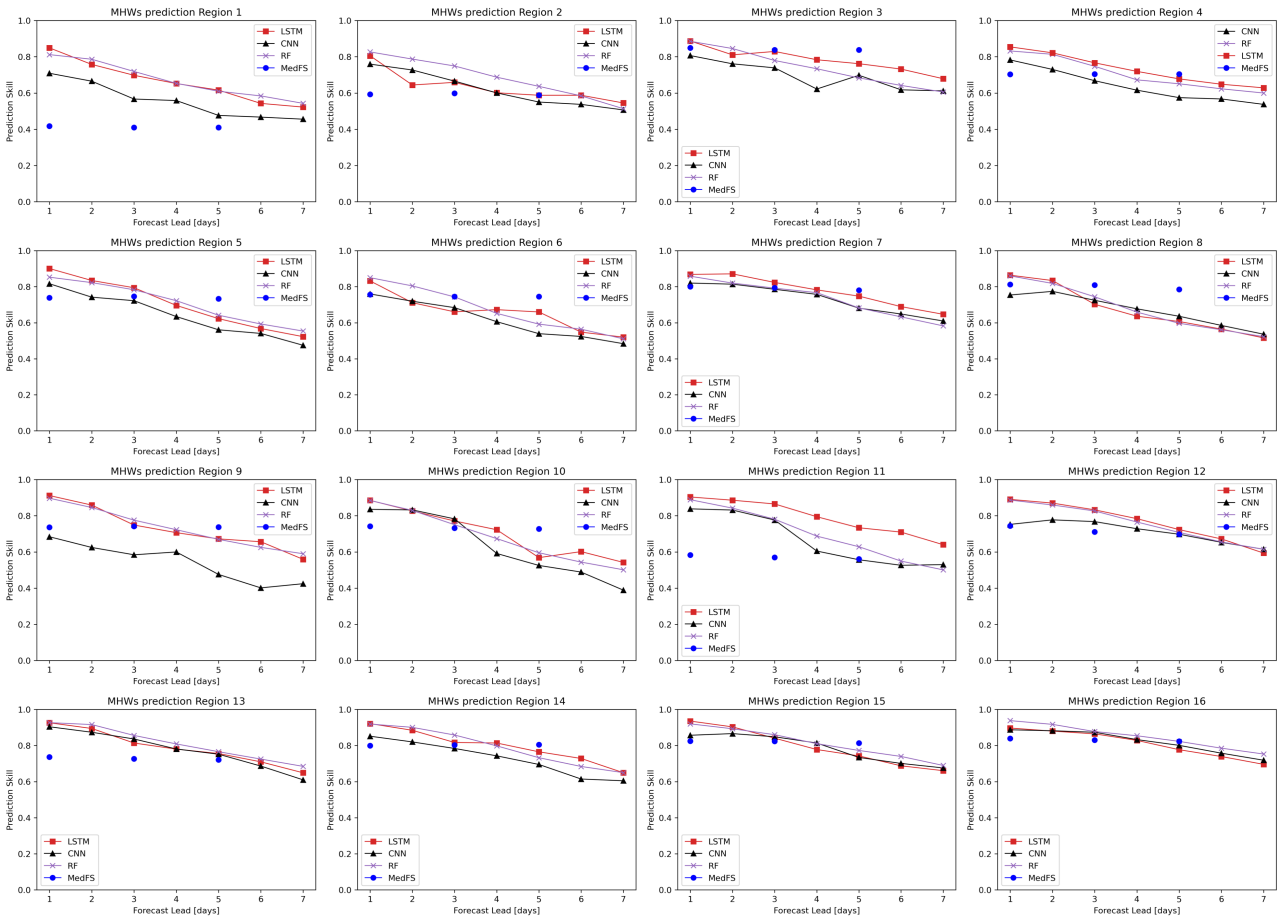

Figure S6: Variation of F1 score for MHWs occurrence prediction with the forecast lead time for each region.

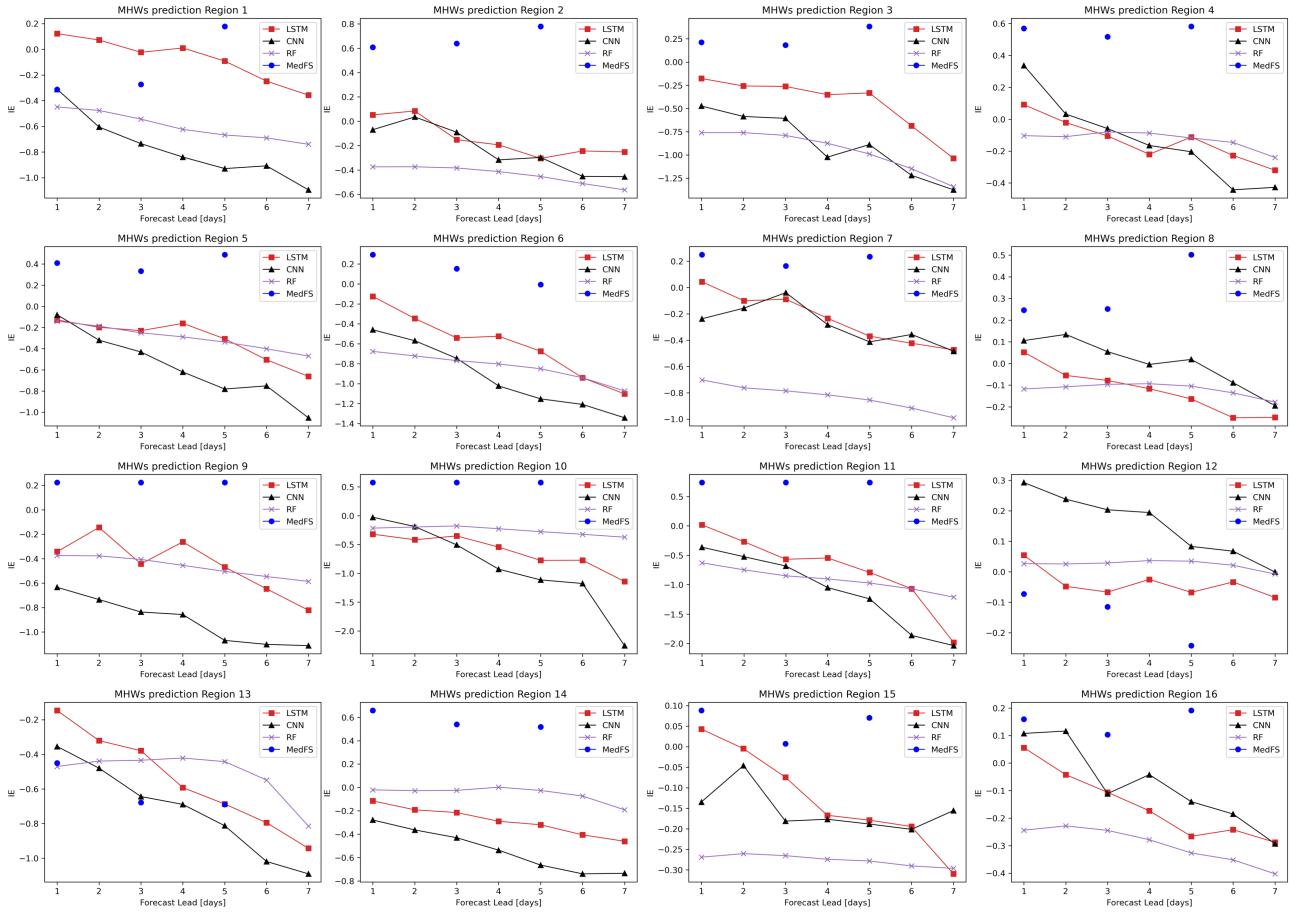

Figure S6: Variation of forecasted MHWs intensity mean error (IE) with the forecast lead time for each region.

| Region ID | Models  | FPR    |        |        | FNR    |        |        | F1 Score    |             |             |
|-----------|---------|--------|--------|--------|--------|--------|--------|-------------|-------------|-------------|
|           |         | L1     | L3     | L5     | L1     | L3     | L5     | L1          | L3          | L5          |
| 1         | LSTM    | 0.02   | 0.02   | 0.04   | 0.29   | 0.44   | 0.47   | 0.79        | 0.68        | 0.61        |
|           | RForest | 0.03   | 0.03   | 0.04   | 0.22   | 0.36   | 0.46   | <b>0.81</b> | <b>0.72</b> | <b>0.62</b> |
|           | CNN     | 0.01   | 0.01   | 0.02   | 0.54   | 0.61   | 0.68   | 0.61        | 0.54        | 0.44        |
|           | LinR    | 0.04   | 0.1    | 0.1    | 0.31   | 0.29   | 0.38   | 0.72        | 0.64        | 0.59        |
|           | MedFS   | 0.01   | 0.02   | 0.02   | 0.68** | 0.68** | 0.68** | 0.42        | 0.41        | 0.41        |
| 2         | LSTM    | 0.01   | 0.03   | 0.06   | 0.39   | 0.43   | 0.40   | 0.73        | 0.66        | 0.64        |
|           | RForest | 0.02   | 0.04   | 0.07   | 0.21   | 0.3    | 0.39   | <b>0.83</b> | <b>0.75</b> | <b>0.63</b> |
|           | CNN     | 0.01   | 0.01   | 0.04   | 0.65** | 0.68** | 0.60** | 0.50        | 0.46        | 0.50        |
|           | LinR    | 0.02   | 0.03   | 0.08   | 0.42   | 0.48   | 0.44   | 0.69        | 0.64        | 0.58        |
|           | MedFS   | 0.10   | 0.09   | 0.09   | 0.33   | 0.36   | 0.36   | 0.59        | 0.60        | 0.59        |
| 3         | LSTM    | 0.02   | 0.03   | 0.04   | 0.09   | 0.15   | 0.27   | <b>0.91</b> | <b>0.87</b> | 0.77        |
|           | RForest | 0.02   | 0.03   | 0.05   | 0.14   | 0.28   | 0.37   | 0.89        | 0.78        | 0.68        |
|           | CNN     | 0.02   | 0.04   | 0.04   | 0.26** | 0.24** | 0.35** | 0.81        | 0.8         | 0.71        |
|           | LinR    | 0.04   | 0.07   | 0.05   | 0.16   | 0.18   | 0.35   | 0.84        | 0.77        | 0.69        |
|           | MedFS   | 0.06   | 0.06   | 0.07   | 0.09   | 0.11   | 0.09   | 0.85        | 0.84        | <b>0.84</b> |
| 4         | LSTM    | 0.10   | 0.10   | 0.14   | 0.10   | 0.06   | 0.12   | 0.78        | <b>0.78</b> | <b>0.71</b> |
|           | RForest | 0.03   | 0.06   | 0.09   | 0.19   | 0.24   | 0.34   | <b>0.83</b> | 0.75        | 0.65        |
|           | CNN     | 0.15** | 0.12** | 0.14** | 0.1    | 0.17   | 0.25   | 0.7         | 0.72        | 0.64        |
|           | LinR    | 0.03   | 0.07   | 0.11   | 0.31** | 0.27   | 0.28   | 0.76        | 0.71        | 0.65        |
|           | MedFS   | 0.07   | 0.07   | 0.06   | 0.29   | 0.31** | 0.31** | 0.70        | 0.70        | 0.70        |
| 5         | LSTM    | 0.02   | 0.06   | 0.07   | 0.2    | 0.15   | 0.3    | <b>0.84</b> | <b>0.82</b> | 0.71        |
|           | RForest | 0.02   | 0.05   | 0.08   | 0.20** | 0.24** | 0.38** | 0.84        | 0.77        | 0.64        |
|           | CNN     | 0.05   | 0.09   | 0.12   | 0.16   | 0.11   | 0.22   | 0.82        | 0.79        | 0.69        |
|           | LinR    | 0.16** | 0.11** | 0.11** | 0.06   | 0.1    | 0.17   | 0.73        | 0.77        | 0.73        |
|           | MedFS   | 0.09   | 0.08   | 0.09   | 0.18   | 0.18   | 0.19   | 0.74        | 0.75        | <b>0.73</b> |
| 6         | LSTM    | 0.01   | 0.01   | 0.02   | 0.27   | 0.39   | 0.51   | 0.82        | 0.73        | 0.62        |
|           | RForest | 0.02   | 0.02   | 0.05   | 0.18   | 0.35   | 0.5    | <b>0.85</b> | 0.74        | 0.59        |
|           | CNN     | 0.08   | 0.04   | 0.06   | 0.09   | 0.27   | 0.34   | 0.81        | <b>0.77</b> | 0.68        |
|           | LinR    | 0.03   | 0.02   | 0.03   | 0.30** | 0.45** | 0.48** | 0.77        | 0.67        | 0.63        |
|           | MedFS   | 0.12** | 0.12** | 0.12** | 0.09   | 0.11   | 0.12   | 0.76        | 0.75        | <b>0.75</b> |
| 7         | LSTM    | 0.12** | 0.14** | 0.17** | 0.04   | 0.05   | 0.11   | 0.79        | 0.76        | 0.7         |
|           | RForest | 0.03   | 0.04   | 0.07   | 0.17** | 0.24** | 0.33** | <b>0.86</b> | <b>0.79</b> | 0.68        |
|           | CNN     | 0.04   | 0.07   | 0.13   | 0.21   | 0.23   | 0.18   | 0.81        | 0.76        | 0.7         |
|           | LinR    | 0.05   | 0.13   | 0.16   | 0.25   | 0.1    | 0.09   | 0.78        | 0.74        | 0.71        |
|           | MedFS   | 0.08   | 0.08   | 0.08   | 0.16   | 0.18   | 0.19   | 0.80        | 0.79        | <b>0.78</b> |
| 8         | LSTM    | 0.05   | 0.09   | 0.13   | 0.17   | 0.25   | 0.33   | 0.82        | 0.71        | 0.61        |
|           | RForest | 0.03   | 0.05   | 0.11   | 0.15   | 0.29** | 0.39** | <b>0.86</b> | 0.74        | 0.60        |
|           | CNN     | 0.08   | 0.11   | 0.17   | 0.14   | 0.25   | 0.25   | 0.78        | 0.68        | 0.62        |
|           | LinR    | 0.04   | 0.1    | 0.25** | 0.31** | 0.20   | 0.10   | 0.74        | 0.73        | 0.62        |
|           | MedFS   | 0.06   | 0.06   | 0.06   | 0.17   | 0.18   | 0.21   | 0.81        | <b>0.81</b> | <b>0.78</b> |
| 9         | LSTM    | 0.02   | 0.02   | 0.04   | 0.19   | 0.37** | 0.49** | 0.87        | 0.74        | 0.63        |
|           | RForest | 0.03   | 0.03   | 0.05   | 0.12   | 0.31   | 0.42   | <b>0.89</b> | <b>0.77</b> | 0.68        |
|           | CNN     | 0.04   | 0.04   | 0.06   | 0.26** | 0.36   | 0.45   | 0.8         | 0.73        | 0.64        |
|           | LinR    | 0.09   | 0.06   | 0.12   | 0.1    | 0.25   | 0.25   | 0.83        | 0.78        | 0.71        |
|           | MedFS   | 0.23** | 0.22** | 0.23** | 0.04   | 0.04   | 0.04   | 0.74        | 0.74        | <b>0.74</b> |
| 10        | LSTM    | 0.00   | 0.00   | 0.01   | 0.50** | 0.57** | 0.64** | 0.66        | 0.6         | 0.52        |
|           | RForest | 0.03   | 0.02   | 0.03   | 0.14   | 0.36   | 0.54   | <b>0.89</b> | <b>0.75</b> | 0.59        |
|           | CNN     | 0.02   | 0.02   | 0.03   | 0.37   | 0.5    | 0.65   | 0.75        | 0.64        | 0.49        |
|           | LinR    | 0.05   | 0.05   | 0.04   | 0.28   | 0.38   | 0.51   | 0.78        | 0.70        | 0.61        |
|           | MedFS   | 0.16** | 0.16** | 0.17** | 0.12   | 0.14   | 0.14   | 0.74        | 0.73        | <b>0.73</b> |
| 11        | LSTM    | 0.02   | 0.02   | 0.01   | 0.17   | 0.35   | 0.48   | 0.87        | 0.76        | <b>0.67</b> |
|           | RForest | 0.03   | 0.02   | 0.03   | 0.12   | 0.31   | 0.49   | <b>0.89</b> | <b>0.78</b> | 0.63        |
|           | CNN     | 0.05   | 0.03   | 0.02   | 0.21   | 0.37** | 0.52** | 0.81        | 0.73        | 0.62        |
|           | LinR    | 0.02   | 0.02   | 0.02   | 0.34** | 0.34   | 0.47   | 0.77        | 0.76        | 0.66        |
|           | MedFS   | 0.27** | 0.27** | 0.27** | 0.17   | 0.19   | 0.2    | 0.58        | 0.57        | 0.56        |
| 12        | LSTM    | 0.04   | 0.06   | 0.1    | 0.09   | 0.15   | 0.18   | <b>0.89</b> | <b>0.85</b> | <b>0.78</b> |
|           | RForest | 0.03   | 0.03   | 0.06   | 0.14   | 0.25   | 0.35   | 0.89        | 0.82        | 0.71        |
|           | CNN     | 0.06   | 0.05   | 0.09   | 0.16   | 0.21   | 0.26   | 0.84        | 0.82        | 0.74        |
|           | LinR    | 0.06   | 0.15** | 0.31** | 0.24   | 0.12   | 0.05   | 0.79        | 0.76        | 0.66        |
|           | MedFS   | 0.01   | 0.01   | 0.01   | 0.39** | 0.43** | 0.44** | 0.74        | 0.71        | 0.70        |
| 13        | LSTM    | 0.01   | 0.01   | 0.04   | 0.26   | 0.31** | 0.35** | 0.84        | 0.80        | 0.76        |
|           | RForest | 0.03   | 0.04   | 0.06   | 0.08   | 0.19   | 0.31   | <b>0.93</b> | <b>0.85</b> | <b>0.76</b> |
|           | CNN     | 0.01   | 0.03   | 0.08   | 0.30** | 0.29   | 0.32   | 0.81        | 0.80        | 0.74        |
|           | LinR    | 0.02   | 0.02   | 0.08   | 0.19   | 0.36   | 0.30   | 0.88        | 0.77        | 0.75        |
|           | MedFS   | 0.35** | 0.34** | 0.35** | 0.07   | 0.10   | 0.11   | 0.74        | 0.73        | 0.72        |
| 14        | LSTM    | 0.02   | 0.03   | 0.05   | 0.18** | 0.24** | 0.32   | 0.89        | 0.84        | 0.76        |
|           | RForest | 0.02   | 0.03   | 0.05   | 0.11   | 0.20   | 0.35** | <b>0.92</b> | <b>0.86</b> | 0.74        |
|           | CNN     | 0.11   | 0.09   | 0.16   | 0.06   | 0.14   | 0.18   | 0.87        | 0.84        | 0.76        |
|           | LinR    | 0.14   | 0.10   | 0.11   | 0.15   | 0.12   | 0.22   | 0.79        | 0.84        | 0.78        |
|           | MedFS   | 0.28** | 0.26** | 0.26** | 0.02   | 0.04   | 0.04   | 0.80        | 0.80        | <b>0.80</b> |
| 15        | LSTM    | 0.03   | 0.04   | 0.07   | 0.18** | 0.31** | 0.38** | 0.88        | 0.78        | 0.71        |
|           | RForest | 0.03   | 0.04   | 0.07   | 0.10   | 0.19   | 0.28   | <b>0.92</b> | <b>0.86</b> | 0.77        |
|           | CNN     | 0.17** | 0.26** | 0.27** | 0.02   | 0.02   | 0.07   | 0.84        | 0.78        | 0.75        |
|           | LinR    | 0.11   | 0.17   | 0.17   | 0.12   | 0.10   | 0.20   | 0.84        | 0.80        | 0.74        |
|           | MedFS   | 0.13   | 0.11   | 0.12   | 0.12   | 0.15   | 0.16   | 0.82        | 0.82        | <b>0.81</b> |
| 16        | LSTM    | 0.02   | 0.04   | 0.06   | 0.11   | 0.18   | 0.25** | 0.92        | 0.87        | 0.80        |
|           | RForest | 0.03   | 0.05   | 0.07   | 0.07   | 0.15   | 0.21   | <b>0.94</b> | <b>0.88</b> | <b>0.82</b> |
|           | CNN     | 0.08   | 0.15   | 0.2    | 0.06   | 0.04   | 0.10   | 0.90        | 0.86        | 0.80        |
|           | LinR    | 0.02   | 0.02   | 0.16   | 0.29** | 0.27** | 0.14   | 0.81        | 0.82        | 0.80        |
|           | MedFS   | 0.18** | 0.16** | 0.17** | 0.07   | 0.10   | 0.11   | 0.84        | 0.83        | 0.82        |

Table S1: ML networks' performance for the MHWs daily predictions in terms of False Positive rates (FPR), False Negative rates (FNR) and F1 score for Long-short term memory (LSTM), Random Forest (RForest), Convolutional Neural Network (CNN), Linear Regression (LinR) and the Mediterranean Forecasting System (MedFs) at the first day of forecast (Forecast

Lead 1, L1), at the third days of forecast (Forecast Lead 3, L3) and at the 5th days of forecast (Forecast Lead 5, L5). Bold values identify the best F1 scores at L1, L3 and L5. Stars (\*\*) identify the highest rates of FPR and FNR at L1, L3 and L5.
